# Supplementary material for: Towards applications in catalysis: investigation on photocatalytic activities of a derivative family of the Keplerate type molybdenum–oxide based polyoxometalates
Source: Royal Society of Chemistry journal article supplement (doi:10.1039/c4ra07700h), 2014-01-01
Supplement: c4ra07700h1.pdf [file c4ra07700h1.pdf]

## Supplementary Material

### Towards applications in catalysis: Investigation on photocatalytic activities of a derivative family of the Kepelerate type molybdenum-oxide based polyoxometalate

Yunshan Zhou,\* Libo Qin, Chao Yu, Tian Xiong, Lijuan Zhang,\* Waqar Ahmad, and Hao Han

State Key Laboratory of Chemical Resource Engineering, Institute of Science, Beijing University of Chemical Technology, Beijing 100029, P. R. China.

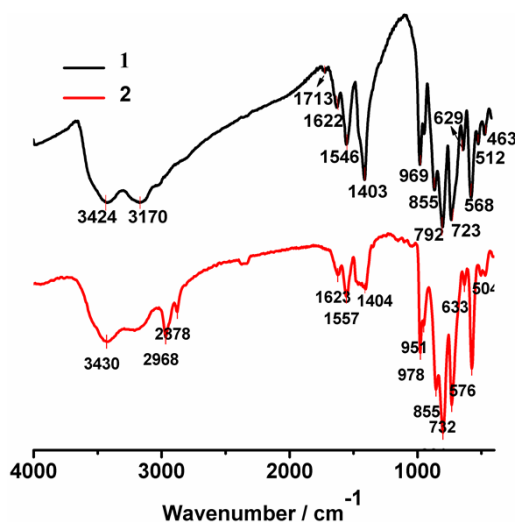

**Fig. S1.** IR of compounds **1** (reference to: A. Müller, E. Krickemeyer, H. Bögge, M. Schmidtman, F. Peters, *Angew. Chem. Int. Ed.* **1998**, 37, 3359-3363) and **2** (reference to: Y. Zhou, Z. Shi, L. Zhang, S. Hassan and N. Qu, *Appl. Phys. A: Mater. Sci. Process.* **2013**, 113, 563-568)

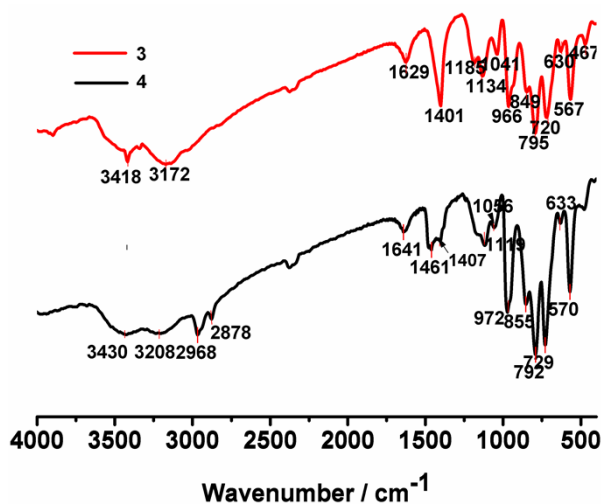

**Fig. S2.** IR spectra of compounds **3** and **4**

It can be seen that the characteristic bands (Fig. S2) ascribed to the  $[\text{Mo}^{\text{VI}}_{72}\text{Mo}^{\text{V}}_{60}\text{O}_{372}(\text{SO}_4)_{30}(\text{H}_2\text{O})_{72}]^{72-}$  anion are nearly remained after formation of the compound **4** derived from the compound **3** (reference to: A. Müller, E. Krickemeyer, H. Bögge, M. Schmidtman, B. Botar, M. O. Talismanova, *Angew. Chem. Int. Ed.* **2003**, 42, 2085-2090), indicating that the structure of the anion in is kept and remained in the compound **4**, while the notable appearance of the middle-strong bands at 2968 ( $\nu_{\text{as}}(\text{C-H})$ ) and 2878 ( $\nu_{\text{s}}(\text{C-H})$ )  $\text{cm}^{-1}$  confirms the presence of the  $\text{Bu}_4\text{N}^+$  cations in the compound **4**. The broad band in the range of 3450~3000  $\text{cm}^{-1}$  centered at 3439 and 3208  $\text{cm}^{-1}$  in **4** corresponds to the O-H stretching vibrations of crystallization water molecules.

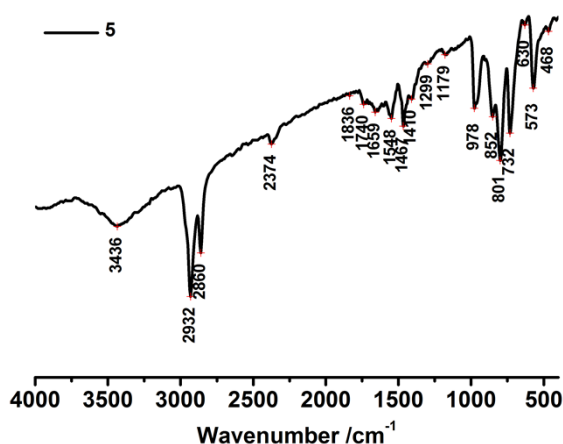

**Fig. S3.** IR spectra of compound **5** (reference to: D. Volkmer, D. G. Kurth, H. Schnablegger, P. Lehmann, M. J. Koop, A. Müller, *J. Am. Chem. Soc.* **2000**, 122, 1995-1998)

#### Thermogravimetric analysis of compound **4**

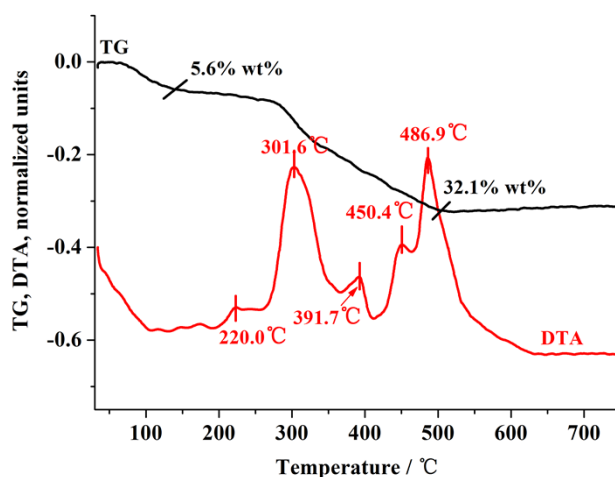

**Fig. S4.** The TG and DTA spectra for compound **4**

As shown in Fig. S4, the weight loss process of compound **4** can be divided into two steps. The first step is from 35 °C to 115 °C with a weight loss of 5.6%, corresponding to the release of 110 lattice

water molecules (calcd. 5.8%), with two corresponding exothermal peak at 43.23 °C in DTA curve. The second weight loss (26.5%) between 115 °C and 750 °C is attributed to the loss of 44 NH<sub>3</sub>, 100 lattice water molecules, 72 coordinated water molecules and the decomposition of organic components (calcd 25.6%), leading to the formation of corresponding [(*n*-Bu)<sub>4</sub>N]<sub>8</sub>[Mo<sup>VI</sup><sub>72</sub>Mo<sup>V</sup><sub>60</sub>O<sub>372</sub>(SO<sub>4</sub>)<sub>30</sub>(H<sub>2</sub>O)<sub>72</sub>], with a few main corresponding exothermal peak at 220.0, 301.6, 391.7, 450.4 and 486.9 °C in DTA curve.

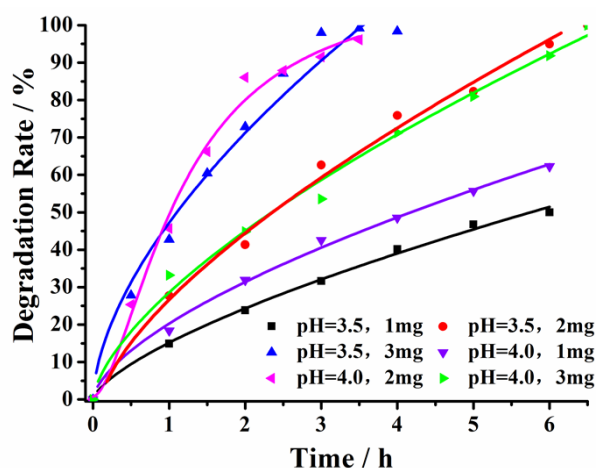

**Fig. S5.** Dosage effects of compound **2** from 1 ~ 3 mg when the initial pH of RhB solution was 3.5 and 4.0, respectively. Reaction condition: 50 ml of 2 mg/L RhB solution.

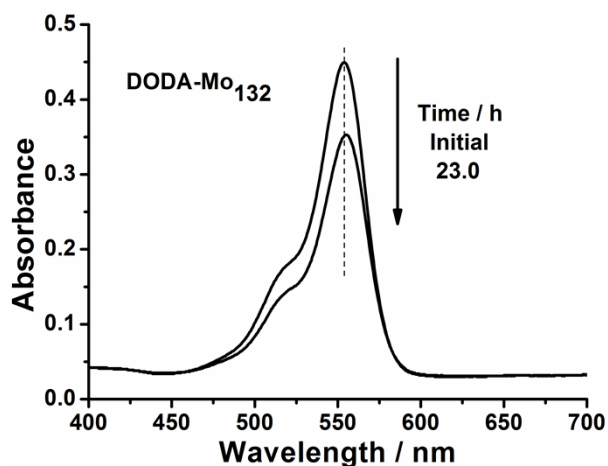

**Fig. S6.** UV-vis spectral changes of RhB during the catalytic process with compound **5** as catalyst. Reaction condition: 50 ml of 2 mg/L RhB solution, pH 3.5, 2 mg of compound **5**

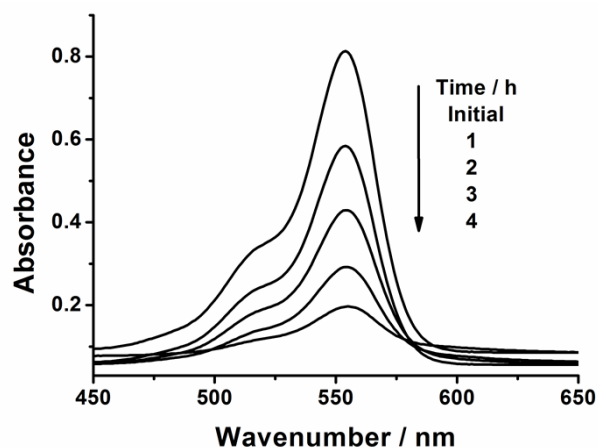

**Fig. S7.** UV-vis spectral changes of RhB during the catalytic process with commercial  $\text{TiO}_2$  as catalyst. The arrow marks the increase of reaction time. Reaction condition: 50 ml of 2 mg/L RhB solution, pH 3.5, 2 mg of  $\text{TiO}_2$ .

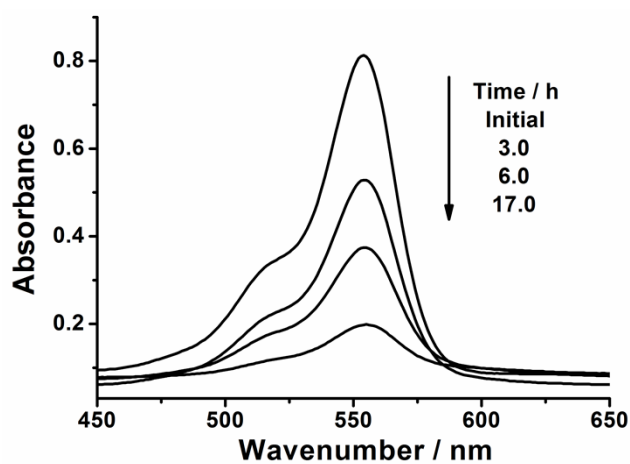

**Fig. S8.** UV-vis spectral changes of RhB during the catalytic process with compound 4 as catalyst. The arrow marks the increase of reaction time. Reaction condition: 50 ml of 2 mg/L RhB solution, pH 3.5, 2 mg of compound 4.

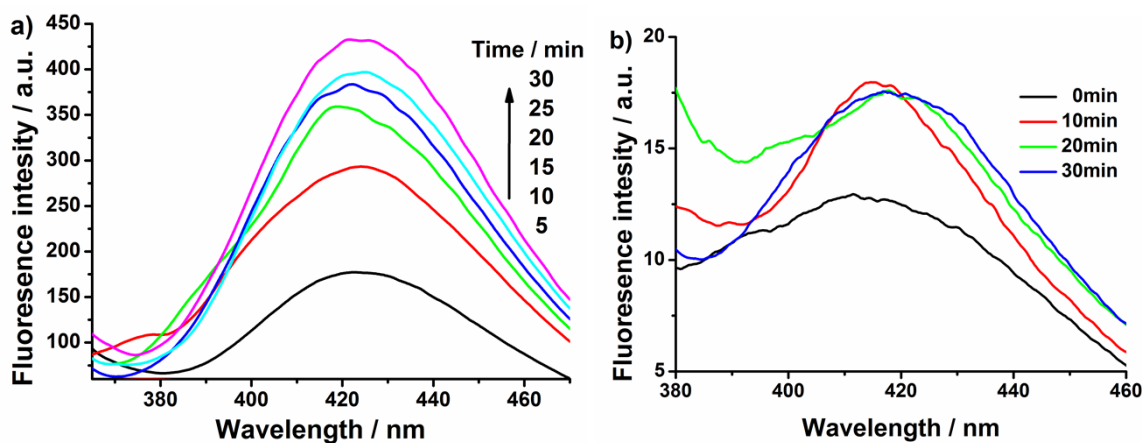

**Fig. S9.** Photoluminescence spectral changes ( $\lambda_{\text{max}} = 425 \text{ nm}$ ) versus UV light irradiation time for compounds **4** (a) and **5** (b) in a  $5 \times 10^{-4} \text{ mol}\cdot\text{L}^{-1}$  basic solution of terephthalic acid (excitation light  $\lambda = 315 \text{ nm}$ , Voltage = 500V, EX slit = 10 nm, EM slit = 10 nm).

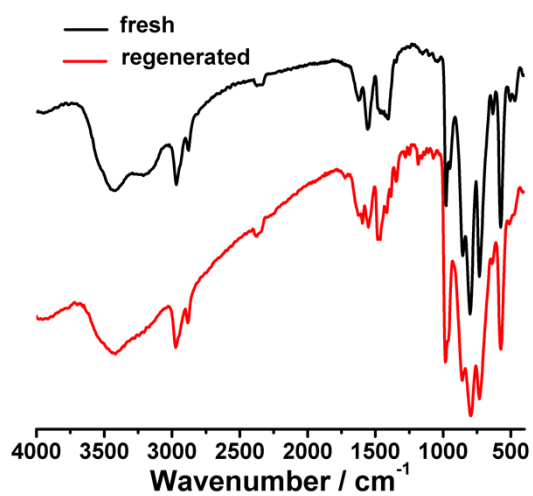

**Fig. S10** IR spectra of fresh and regenerated compound **2**.
